# Supplementary material for: Development of cholate conjugated hybrid polymeric micelles for FXR receptor mediated effective site-specific delivery of paclitaxel
Source: Royal Society of Chemistry journal article supplement (doi:10.1039/c8nj03251c), 2018-01-01
Supplement: c8nj03251c1.pdf [file c8nj03251c1.pdf]

## Supplementary data

### Development of cholate conjugated hybrid polymeric micelles for FXR receptor mediated effective site-specific delivery of paclitaxel

Sivaraj Mehnath<sup>a</sup>, Mukherjee Arjama<sup>a</sup>, Mariappan Rajan<sup>b</sup>, Murugaraj Jeyaraj<sup>a\*</sup>

<sup>a</sup>University of Madras, Guindy Campus, Chennai-25, Tamil Nadu, India.

<sup>b</sup>Madurai Kamaraj University, Madurai-21, Tamil Nadu, India.

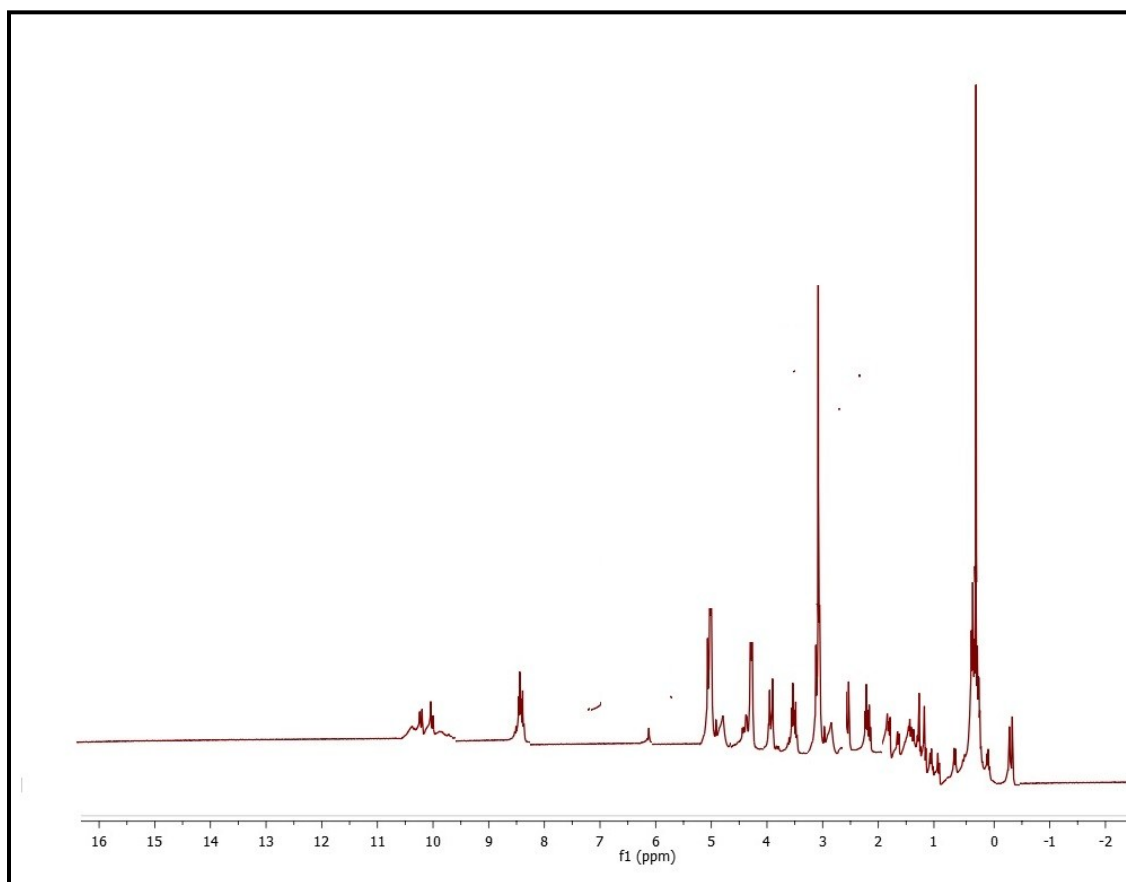

Figure S1. <sup>1</sup>H NMR spectrum of CA-PCPP.

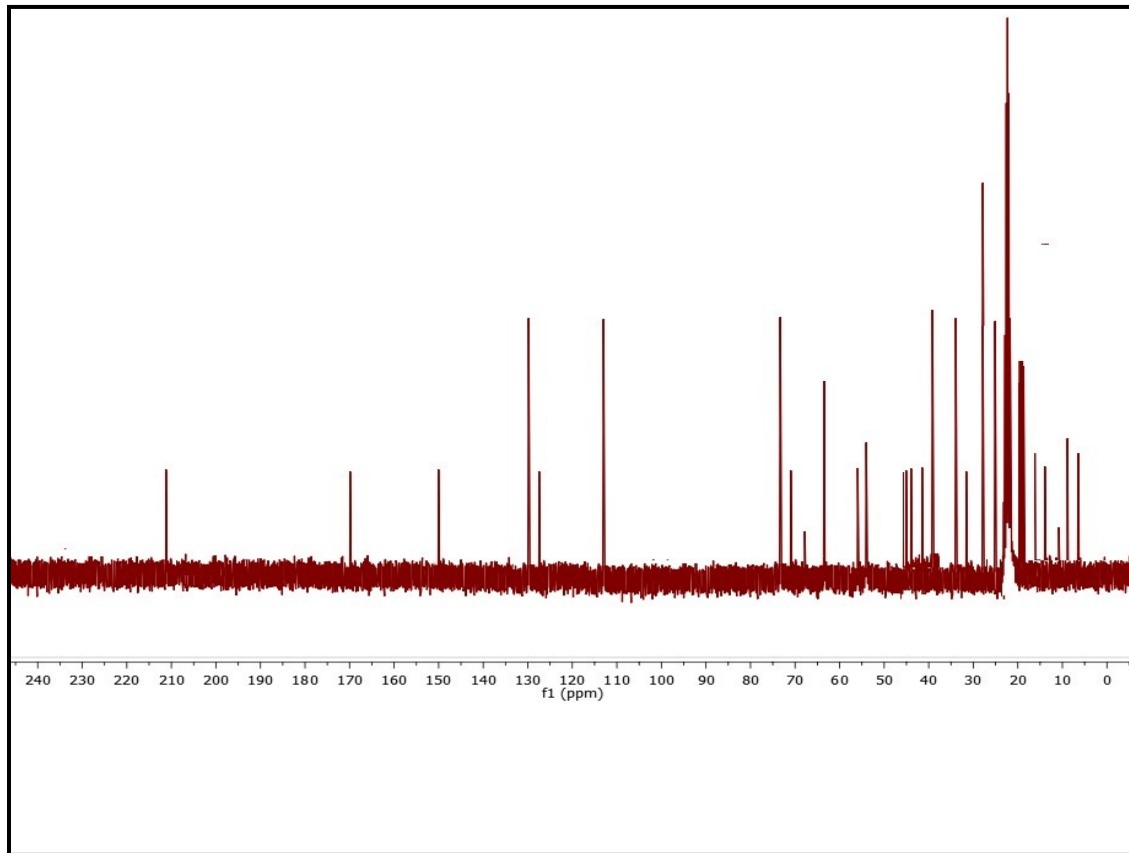

**Figure S2.**  $^{13}\text{C}$  NMR spectrum of CA-PCPP.

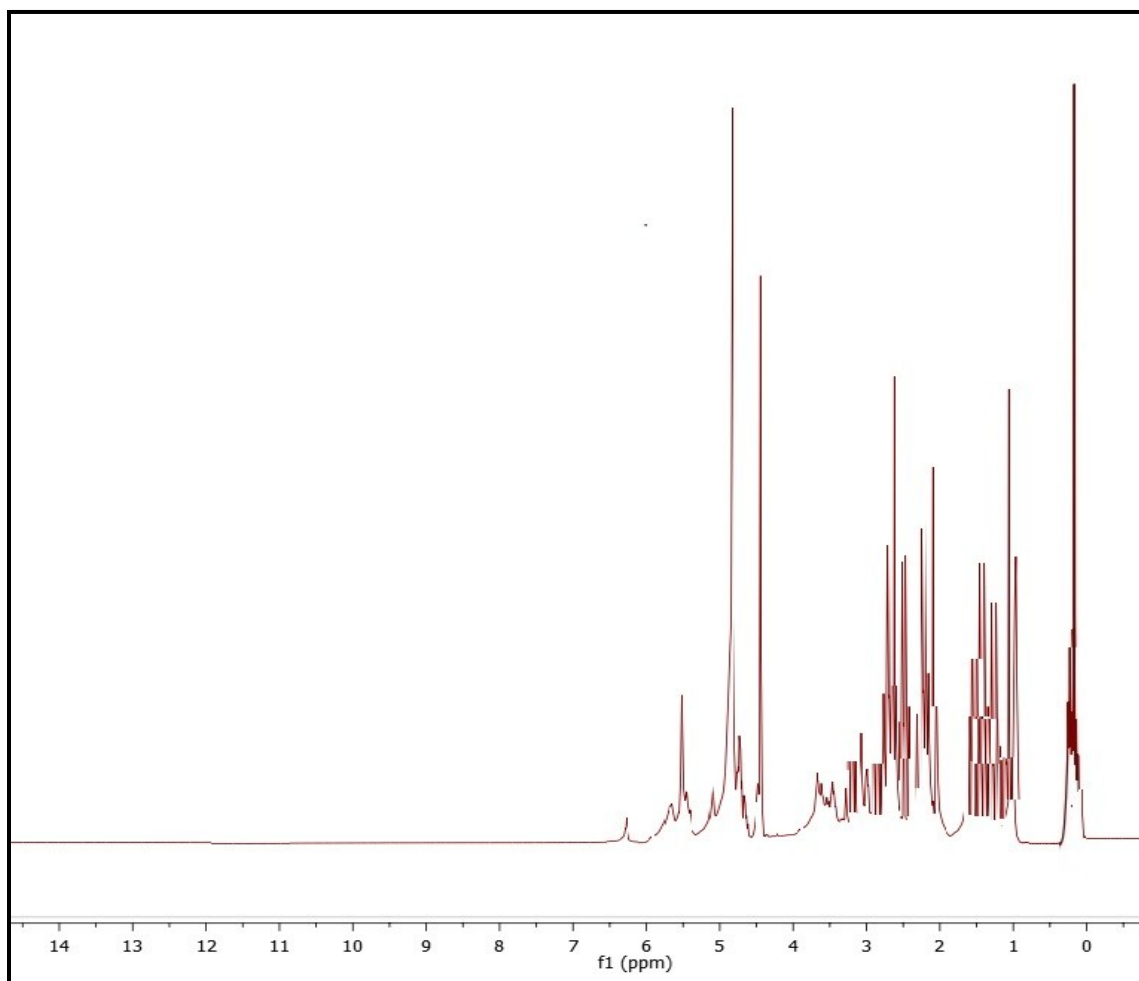

**Figure S3.  $^1\text{H}$  NMR spectrum of CA-PDADMAC.**

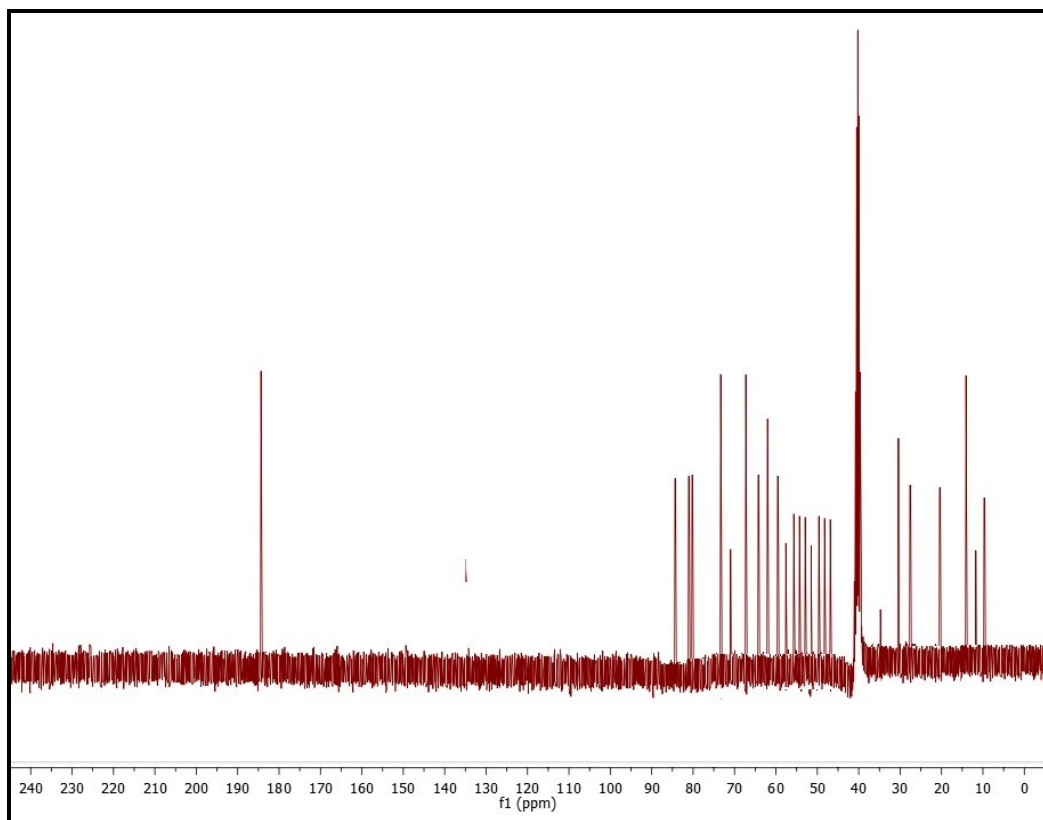

**Figure S4.**  $^{13}\text{C}$  NMR spectrum of CA-PDADMAC.

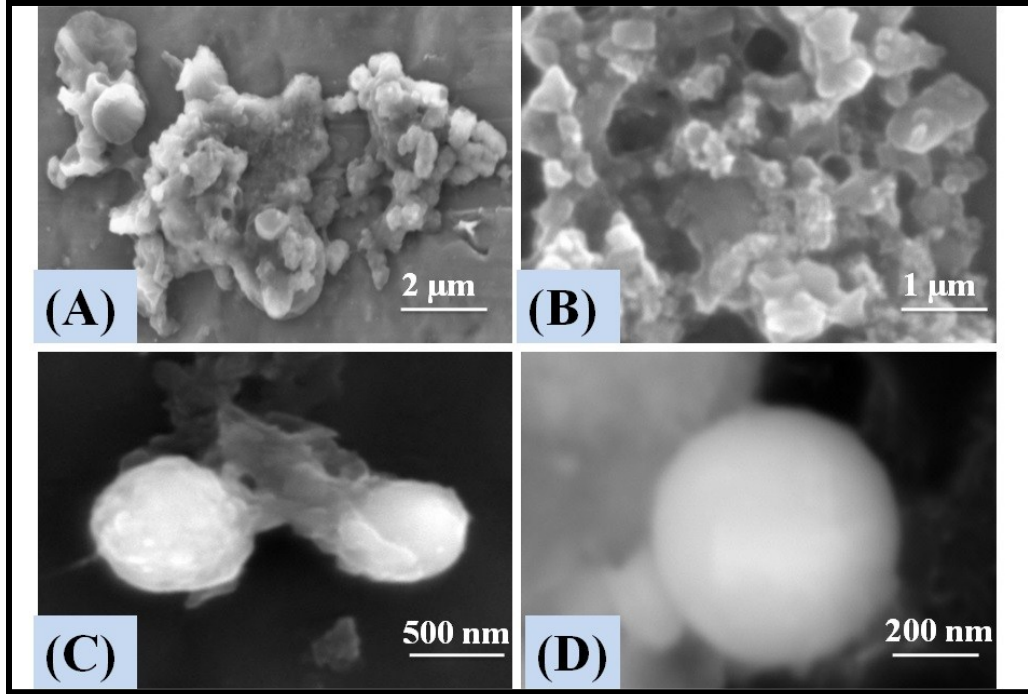

**Figure. S5. SEM image of (A) CA-PCPP-PDADMAC-CA polymer (2 μm) (B) 1 μm (C) PTX loaded CA-PCPP-PDADMAC-CA (500 nm) (D) 200 nm.**

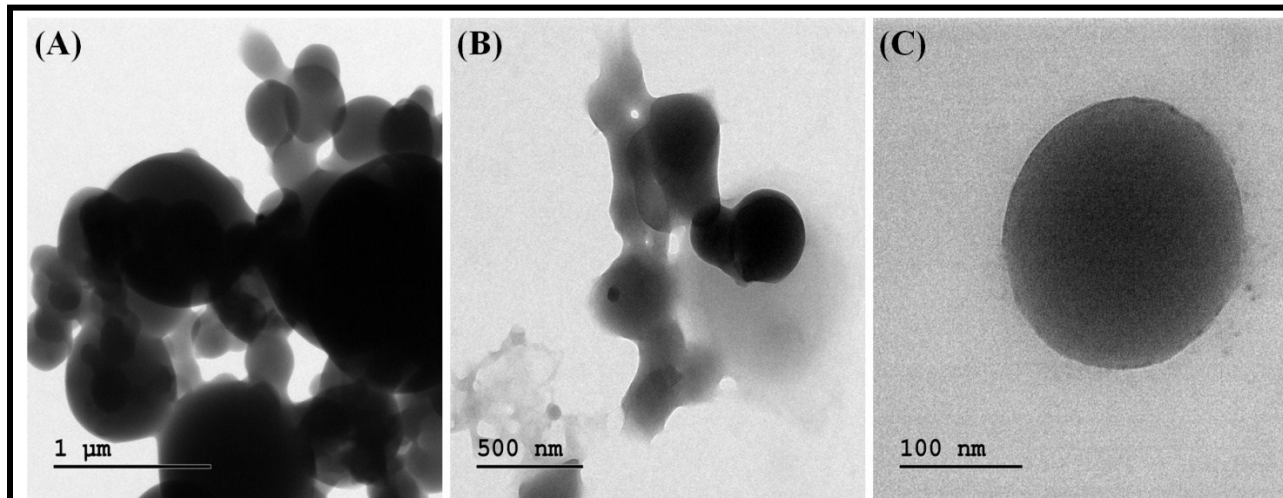

**Figure. S6. HR-TEM images of PTX loaded CA-PCPP-PDADMAC-CA polymeric micelles**

**(A) 1  $\mu\text{m}$  (B) 500 nm (C) 100 nm.**

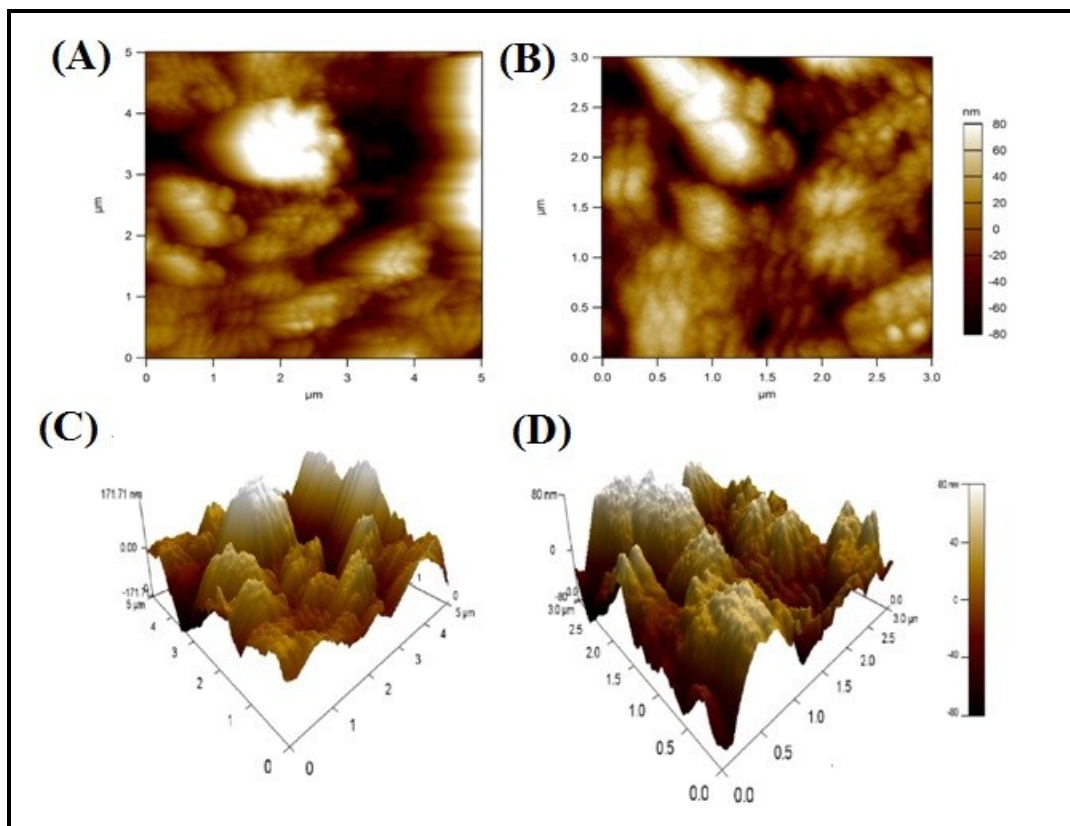

**Figure. S7.** AFM 2D images of (A) CA-PCPP-PDADMAC-CA polymeric micelles (B) PTX drug loaded CA-PCPP-PDADMAC-CA polymeric micelles. AFM 3D image of (C) CA-PCPP-PDADMAC-CA polymeric micelles (D) PTX drug loaded CA-PCPP-PDADMAC-CA polymeric micelles.

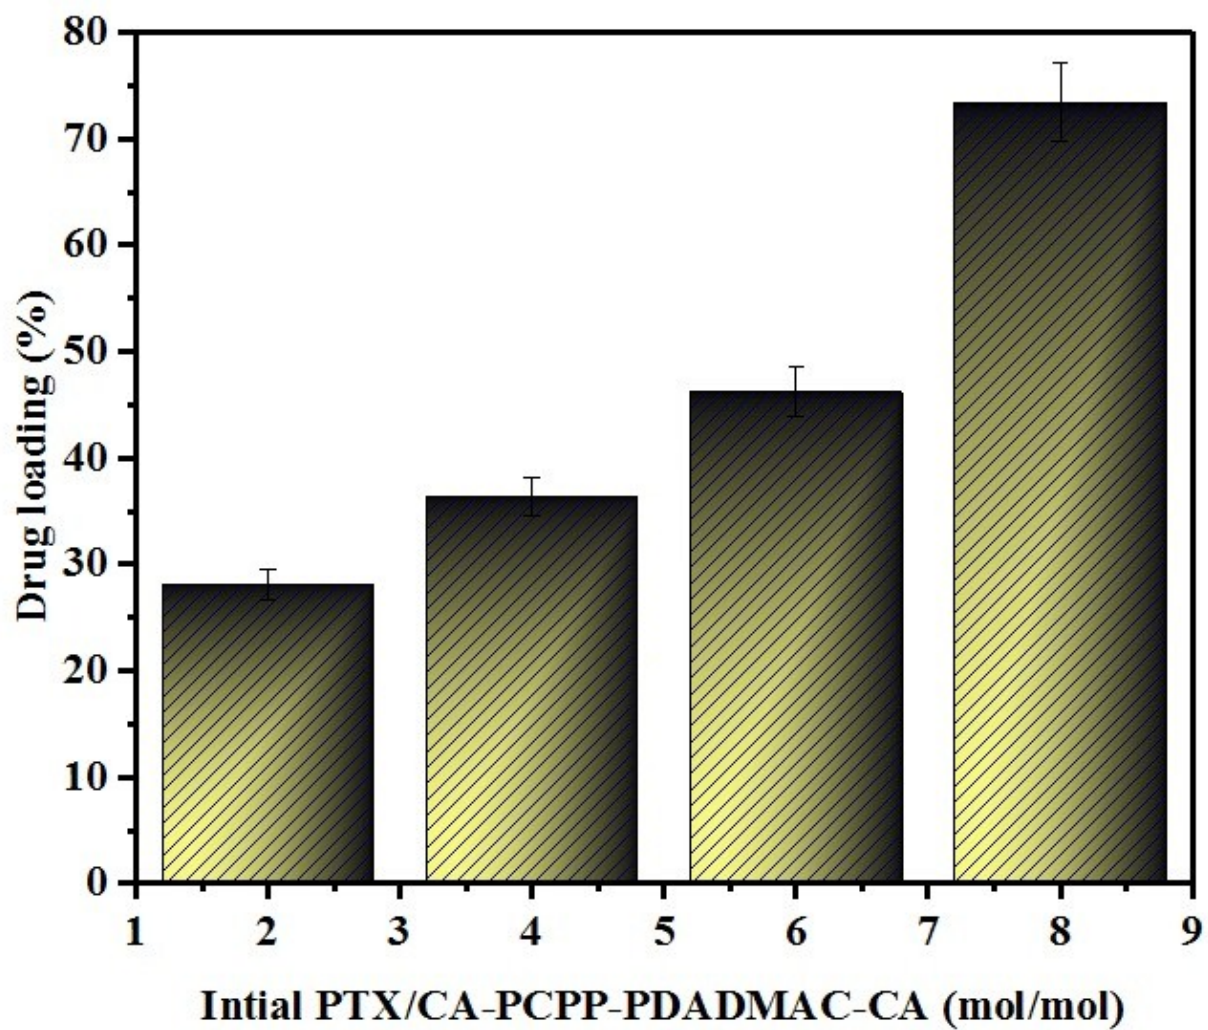

Fig. S8 Different concentration of PTX encapsulation in CA-PCPP-PDADMAC-CA
